# Supplementary material for: Sex and Gender Disparities in Living Kidney Donation: A Scoping Review
Source: PubMed Central journal article supplement — Transplant Direct. 2023 Aug 24;9(9):e1530. doi: 10.1097/TXD.0000000000001530 (PMC10455160; doi:10.1097/txd.0000000000001530), 2023-08-24
Supplement: txd-9-e1530-s001.pdf [file txd-9-e1530-s001.pdf]

## **Supplemental Digital Content for Manuscript**

### **Sex and Gender Disparities in Living Kidney Donation: A Scoping Review**

#### **Contents:**

**Tables S1: Search strategies in all 4 databases.**

**Table S2: Characteristics of Included studies.**

**Tables S1: Search strategies**

**MEDLINE SEARCH STRATEGY**

Ovid MEDLINE(R) ALL <1946 to March 17, 2022>, and then updated search on 13<sup>th</sup> March 2023 using the same search terms.

| #  | Searches                                                                                        |
|----|-------------------------------------------------------------------------------------------------|
| 1  | Sex Factors/ or Sex Characteristics/                                                            |
| 2  | sex disparit*.mp.                                                                               |
| 3  | sex factor*.mp.                                                                                 |
| 4  | sex characteristic*.mp.                                                                         |
| 5  | Sexism/                                                                                         |
| 6  | sexism.mp.                                                                                      |
| 7  | sex bias*.mp.                                                                                   |
| 8  | sex inequalit*.mp.                                                                              |
| 9  | gender disparit*.mp.                                                                            |
| 10 | gender bias*.mp.                                                                                |
| 11 | Gender Identity/                                                                                |
| 12 | gender inequalit*.mp.                                                                           |
| 13 | Transgender Persons/                                                                            |
| 14 | transgender*.mp.                                                                                |
| 15 | "Sexual and Gender Minorities"/                                                                 |
| 16 | Intersex Persons/                                                                               |
| 17 | intersex person*.mp.                                                                            |
| 18 | "sexual and gender minorit*".mp.                                                                |
| 19 | 1 or 2 or 3 or 4 or 5 or 6 or 7 or 8 or 9 or 10 or 11 or 12 or 13 or 14 or 15 or 16 or 17 or 18 |
| 20 | Living Donors/                                                                                  |
| 21 | living kidney donor*.mp.                                                                        |
| 22 | kidney donor*.mp.                                                                               |
| 23 | renal donor*.mp.                                                                                |
| 24 | living kidney donat*.mp.                                                                        |
| 25 | kidney donat*.mp.                                                                               |
| 26 | renal donat*.mp.                                                                                |
| 27 | 20 or 21 or 22 or 23 or 24 or 25 or 26                                                          |
| 28 | 19 and 27                                                                                       |

## EMBASE SEARCH STRATEGY

Embase Classic <1947 to 1973>

Embase <1974 to 16 March 2022>, and then updated search on 13<sup>th</sup> March 2023 using the same search terms.

| #  | Query                                                                                           |
|----|-------------------------------------------------------------------------------------------------|
| 1  | sex difference/                                                                                 |
| 2  | sex disparit*.mp.                                                                               |
| 3  | sex factor/                                                                                     |
| 4  | sex factor*.mp.                                                                                 |
| 5  | gender bias/                                                                                    |
| 6  | sex bias*.mp.                                                                                   |
| 7  | sexism/                                                                                         |
| 8  | sexism.mp.                                                                                      |
| 9  | sexual characteristics/                                                                         |
| 10 | sex characteristic*.mp.                                                                         |
| 11 | gender inequality/                                                                              |
| 12 | gender disparit*.mp.                                                                            |
| 13 | transgender/                                                                                    |
| 14 | transgender*.mp.                                                                                |
| 15 | gender identity/                                                                                |
| 16 | gender identit*.mp.                                                                             |
| 17 | "sexual and gender minority"/                                                                   |
| 18 | (sexual and gender minorit*).mp.                                                                |
| 19 | 1 or 2 or 3 or 4 or 5 or 6 or 7 or 8 or 9 or 10 or 11 or 12 or 13 or 14 or 15 or 16 or 17 or 18 |
| 20 | living donor/                                                                                   |
| 21 | living kidney donor*.mp.                                                                        |
| 22 | kidney donor/                                                                                   |
| 23 | kidney donor*.mp.                                                                               |
| 24 | kidney donat*.mp.                                                                               |
| 25 | renal donor*.mp.                                                                                |
| 26 | renal donat*.mp.                                                                                |
| 27 | 20 or 21 or 22 or 23 or 24 or 25 or 26                                                          |
| 28 | 19 and 27                                                                                       |

## PSYCINFO SEARCH STRATEGY

APA PsycInfo <1806 to 16 March 2022>, and then updated search on 13<sup>th</sup> March 2023 using the same search terms.

|    |                                                                                                                   |
|----|-------------------------------------------------------------------------------------------------------------------|
| 1  | human sex differences/                                                                                            |
| 2  | social equality/                                                                                                  |
| 3  | sex role attitudes/                                                                                               |
| 4  | sex disparit*.mp.                                                                                                 |
| 5  | sex inequalit*.mp.                                                                                                |
| 6  | sex bias*.mp.                                                                                                     |
| 7  | sexism.mp.                                                                                                        |
| 8  | gender gap/                                                                                                       |
| 9  | gender equality/                                                                                                  |
| 10 | sex roles/                                                                                                        |
| 11 | gender disparit*.mp.                                                                                              |
| 12 | gender bias*.mp.                                                                                                  |
| 13 | gender inequalit*.mp                                                                                              |
| 14 | gender gap*.mp.                                                                                                   |
| 15 | sex gap*.mp.                                                                                                      |
| 16 | transgender/                                                                                                      |
| 17 | transgender*.mp.                                                                                                  |
| 18 | gender identity/                                                                                                  |
| 19 | gender identit*.mp.                                                                                               |
| 20 | "sexual and gender minorit*".mp.                                                                                  |
| 21 | sex identit*.mp.                                                                                                  |
| 22 | 1 or 2 or 3 or 4 or 5 or 6 or 7 or 8 or 9 or 10 or 11 or 12 or 13 or 14 or 15 or 16 or 17 or 18 or 19 or 20 or 21 |
| 23 | tissue donation/                                                                                                  |
| 24 | organ transplantation/                                                                                            |
| 25 | living kidney donation*.mp.                                                                                       |
| 26 | kidney donor*.mp.                                                                                                 |
| 27 | organ transplantation*.mp.                                                                                        |
| 28 | tissue donation*.mp.                                                                                              |
| 29 | renal donor*.mp.                                                                                                  |
| 30 | 23 or 24 or 25 or 26 or 27 or 28 or 29                                                                            |
| 31 | 22 and 30                                                                                                         |

## CINAHL SEARCH STRATEGY

From 1946 to 16 March 2022, and then updated search on 13<sup>th</sup> March 2023 using the same search terms.

|     |                                                                                     |
|-----|-------------------------------------------------------------------------------------|
| S1  | "sex difference*" OR (MH "Sex Factors") OR (MH "Sexism+") OR (MH "Gender Bias")     |
| S2  | (MH "Sex Factors") OR (MH "Gender Bias") OR "sex disparit"                          |
| S3  | (MH "Sexual and Gender Minorities+") OR (MH "Sex Factors") OR "gender difference**" |
| S4  | "gender disparit*" OR (MH "Sexual and Gender Minorities+") OR (MH "Gender Bias")    |
| S5  | (MH "Gender Bias") OR "gender bias**"                                               |
| S6  | "sex bias**"                                                                        |
| S7  | (MH "Sexism+") OR (MH "Gender Bias") OR "sex characteristic**"                      |
| S8  | (MH "Sexism+") OR "sexism" OR (MH "Gender Bias")                                    |
| S9  | S1 OR S2 OR S3 OR S4 OR S5 OR S6 OR S7 OR S8                                        |
| S10 | (MH "Living Donors") OR "kidney donor**"                                            |
| S11 | (MH "Living Donors") OR "living donor" OR (MH "Transplant Donors+")                 |
| S12 | (MH "Living Donors") OR "renal donor**"                                             |
| S13 | (MH "Organ Donation") OR "kidney donat**"                                           |
| S14 | (MH "Living Donors") OR "living kidney donor**"                                     |
| S15 | S10 OR S11 OR S12 OR S13 OR S14                                                     |
| S16 | S9 AND S15                                                                          |

**Table S2: Characteristics of included studies**

| Study ID                      | Aim of the study                                                                                                                                                                                                                                                                                                                     | Region                  | Study design    | Population description and inclusion criteria                                                                                                                                                      | Number of participants | Gender distribution (% males) | Mean age (years) (SD, Range) |
|-------------------------------|--------------------------------------------------------------------------------------------------------------------------------------------------------------------------------------------------------------------------------------------------------------------------------------------------------------------------------------|-------------------------|-----------------|----------------------------------------------------------------------------------------------------------------------------------------------------------------------------------------------------|------------------------|-------------------------------|------------------------------|
| Achille 2007 <sup>1</sup>     | To identify differences in psychological profiles between men and women living kidney donors which have led to the gender disparity in donation: Are women donors more likely to 1. Display altruistic and gender typed nurturing behavior? 2. Be influenced by family pressures to donate and be less able to resist this pressure? | North America           | Cross-sectional | Living kidney donors who donated between 1996 and 2005 and were genetically or emotionally related directed donors.                                                                                | 39                     | 34                            | 50.6 (SD=11.7, R=26-71)      |
| Adekoya 2012 <sup>2</sup>     | To assess the willingness of the general population of Nigeria to donate a kidney.                                                                                                                                                                                                                                                   | Sub-Saharan Africa      | Cross-sectional | General Nigerian population 16 to 68yrs age in 4 major towns.                                                                                                                                      | 1300                   | 56                            | 39.5 (SD=10.7, R=16-68)      |
| Almeida 2013 <sup>3</sup>     | Study A: To explore the awareness level and attitude towards kidney donation as function of age, gender and religion.<br>Study B: To ascertain the attitude towards deceased kidney donation.                                                                                                                                        | South-Asia              | Cross-sectional | Adult general population in India.                                                                                                                                                                 | 239                    | 50                            | 30 (R = 20-40)               |
| Bailey 2017 <sup>4</sup>      | To investigate the sociodemographic predictors of living kidney donation and main reasons for nondonation being donor withdrawal or donors being clinically unfit for donation.                                                                                                                                                      | Europe and Central Asia | Cohort          | Potential living kidney donors and their indented recipients in 7 centers in UK.                                                                                                                   | 805                    | 44                            | 45                           |
| Bloembergen 1996 <sup>5</sup> | To study the effect of gender on living related transplantation and donation.                                                                                                                                                                                                                                                        | North America           | Cross-sectional | Living related kidney donors.                                                                                                                                                                      | 5711                   | 44                            | NR                           |
| Bromberger 2017 <sup>6</sup>  | Primary: To identify sex-specific points of attrition where women failed to progress toward successful living donor kidney transplant.<br>Secondary: To identify the programmatic interventions that improve sex equity in living donor kidney transplantation.                                                                      | North America           | Cohort          | Kidney transplant candidates listed between 2007 to 2013 with living donor referrals. Analysis done on cohort of crossmatched candidates who had complete history available of sensitizing events. | 502                    | 42                            | NR                           |

| Study ID                   | Aim of the study                                                                                                                                                                                           | Region                       | Study design    | Population description and inclusion criteria                                                                                                           | Number of participants | Gender distribution (% males) | Mean age (years) (SD, Range) |
|----------------------------|------------------------------------------------------------------------------------------------------------------------------------------------------------------------------------------------------------|------------------------------|-----------------|---------------------------------------------------------------------------------------------------------------------------------------------------------|------------------------|-------------------------------|------------------------------|
| Decker 2008 <sup>7</sup>   | To ascertain the viewpoint of German people towards the commodification of body-parts in organ donation. To determine if gender imbalance in organ donation also applied to the attitude of German people. | Europe and Central Asia      | Cross-sectional | Adult German general population.                                                                                                                        | 1000                   | 43                            | 44.5 (SD=18.2, R=14-92)      |
| Feizi 2019 <sup>8</sup>    | To examine factors that shape the WTA (willingness to accept) of kidney donors.                                                                                                                            | Middle East and North Africa | Cross-sectional | Kidney donors registered with Iranian kidney donation website between Aug 2016 and April 2018.                                                          | 534                    | 87                            | 31 (R=18-51)                 |
| Ge 2014 <sup>9</sup>       | To clarify knowledge and attitudes regarding living-organ donation among Chinese medical students and analyze their incentives and influencing factors.                                                    | East Asia and Pacific        | Cross-sectional | Chinese Medical students in the Zhejiang Medical University.                                                                                            | 320                    | 43                            | NR                           |
| Ghods 2003 <sup>10</sup>   | To determine if there is any gender bias regarding access of women to kidney transplant and to analyze the reasons from sociocultural perspective.                                                         | Middle East and North Africa | Cross-sectional | Renal transplant recipients and donors from 1986 to 2002 in single center at Tehran.                                                                    | 1500                   | 78                            | NR                           |
| Gibney 2010 <sup>11</sup>  | To obtain information regarding the health insurance status of US living kidney donors.                                                                                                                    | North America                | Cross-sectional | Living kidney donors between July 2004 and Sep 2006.                                                                                                    | 10 021                 | 41                            | NR                           |
| Gill 2018 <sup>12</sup>    | To determine longitudinal changes in living kidney donation focusing on effect of donor sex and income.                                                                                                    | North America                | Ecological      | All Adult Living kidney donors between 18-69yrs between 2005-2015.                                                                                      | 52 690                 | 39                            | NR                           |
| Guden 2013 <sup>13</sup>   | To determine the attitudes and behaviours of religious scholars regarding organ donation and transplantation in Turkey.                                                                                    | Europe and Central Asia      | Cross-sectional | Religious officials and teachers from Kur'an course in Kayseri Province in Turkey.                                                                      | 468                    | 62                            | 34.4 (SD=7.9)                |
| Inthorn 2014 <sup>14</sup> | To gain insight into the point of view of German students regarding living and deceased organ donation and different forms of commercialization.                                                           | Europe and Central Asia      | Cross-sectional | Students in Medicine and Economics in German University of Gottingen between Oct 2008 to Feb 2009.                                                      | 755                    | 48                            | NR                           |
| Kayler 2002 <sup>15</sup>  | To compare the demographic characteristics of living related and unrelated donor transplants to determine the influence of gender pairing and spousal relationship on living kidney donation.              | North America                | Cross-sectional | Living related and unrelated renal transplant donor-recipient pairs who were transplanted between 1964 to 2000 in University of Michigan health system. | 1182                   | 45                            | NR                           |

| Study ID                            | Aim of the study                                                                                                                                                                                                                                                                                                                                                      | Region                       | Study design    | Population description and inclusion criteria                                                                                                                                                                             | Number of participants | Gender distribution (% males) | Mean age (years) (SD, Range) |
|-------------------------------------|-----------------------------------------------------------------------------------------------------------------------------------------------------------------------------------------------------------------------------------------------------------------------------------------------------------------------------------------------------------------------|------------------------------|-----------------|---------------------------------------------------------------------------------------------------------------------------------------------------------------------------------------------------------------------------|------------------------|-------------------------------|------------------------------|
| Kayler 2003 <sup>16</sup>           | To examine national data to assess donor-recipient gender combinations in 3 types of living donor kidney transplants (1) Biologically living related (2) Living unrelated spousal (3) Living unrelated nonspousal donor transplants. To perform graft survival analysis among gender pairs to identify advantages and disadvantages of existing patterns of donation. | North America                | Cross-sectional | Living kidney donors of transplant recipients in Organ procurement and transplantation network database who received live donor transplant between Jan 1990 and Dec 1999 with follow up till Oct 2001.                    | 30 258                 | 43                            | NR                           |
| Kayler 2005 <sup>17</sup>           | To examine single-center data for patterns of volunteerism, testing, and exclusion among potential living kidney donors stratified by candidate gender.                                                                                                                                                                                                               | North America                | Cross-sectional | Kidney transplant recipients who had a potential living donor and who received kidney from living donors or deceased donors.                                                                                              | 1015                   | 50                            | NR                           |
| Khajehdehi 1999 <sup>18</sup>       | To determine the effect of recipient and donor social status, age and gender on renal allograft accessibility for transplantation using living nonrelated compared to related donors. To study the motives of living related and unrelated donors and their effect on donation process.                                                                               | Middle East and North Africa | Cohort          | All consecutive newly admitted regular HD patients who did not have contraindications for renal transplant and their donors over a 4-year period in the main teaching hospitals of Shiraz University of Medical Sciences. | 78                     | 40                            | 39.9                         |
| Kurnikowski 2022 <sup>19</sup>      | To examine country specific sex disparities in living kidney donation.                                                                                                                                                                                                                                                                                                | Europe and Central Asia      | Ecological      | Living kidney donors from 16 different countries which reported sex distribution.                                                                                                                                         | 36 666                 | 45                            | NR                           |
| Loiselle 2021 <sup>20</sup>         | To investigate whether marijuana use in living donor candidates is associated with psychological risk factors that place them at higher risk of adverse events and evaluate the association between marijuana use and donor candidacy.                                                                                                                                | North America                | Case-control    | Renal donor candidates who made contact with the donor team at a single academic medical institution from August 1998 to January 2019.                                                                                    | 755                    | 36                            | 44.1 (SD= 12.7)              |
| Malakoutian 2007 <sup>21</sup>      | To study the socioeconomic status of living unrelated kidney donors in Iran.                                                                                                                                                                                                                                                                                          | Middle East and North Africa | Cross-sectional | Living unrelated kidney donors in 30 different transplant centers in Iran between October 2005 and March 2006                                                                                                             | 478                    | 82                            | 27 (SD= 4.8)                 |
| Martinez-Alarcon 2015 <sup>22</sup> | To analyze the attitude of Spanish veterinary students towards living Kidney donation.                                                                                                                                                                                                                                                                                | Europe and Central Asia      | Cross-sectional | Fifth-year veterinary science students in 2 Spanish universities.                                                                                                                                                         | 1041                   | NR                            | NR                           |



| Study ID                         | Aim of the study                                                                                                                                                                                                               | Region                  | Study design    | Population description and inclusion criteria                                                                                                                                                                 | Number of participants | Gender distribution (% males) | Mean age (years) (SD, Range) |
|----------------------------------|--------------------------------------------------------------------------------------------------------------------------------------------------------------------------------------------------------------------------------|-------------------------|-----------------|---------------------------------------------------------------------------------------------------------------------------------------------------------------------------------------------------------------|------------------------|-------------------------------|------------------------------|
| Milaniak 2020 <sup>23</sup>      | To assess the factors influencing decision making about living donation among medical students.                                                                                                                                | Europe and Central Asia | Cross-sectional | Students studying nursing or paramedics in 2 Polish Universities between 19-59 years of age.                                                                                                                  | 311                    | 13                            | NR                           |
| Mithra 2013 <sup>24</sup>        | To obtain insight into awareness and attitudes towards organ donation and to evaluate the factors associated with awareness and attitudes among people seeking healthcare in the tertiary care centers of coastal south India. | South-Asia              | Cross-sectional | General population seeking healthcare as outpatients for general health reasons in 3 tertiary care centers in the city of Mangalore.                                                                          | 863                    | 62                            | NR                           |
| Naqvi 1998 <sup>25</sup>         | To identify the problems in selecting suitable donors in a living-related transplant program.                                                                                                                                  | South-Asia              | Cross-sectional | 784 prospective donors in the period 1988-1992. 1831 potential donors in the period 1993-1997.                                                                                                                | 2615                   | NS                            | NR                           |
| Oien 2005 <sup>26</sup>          | To assess donor-recipient gender combinations in first live donor kidney transplantation and to investigate the impact of donor sex on the incidence of acute rejection, graft function and graft survival.                    | Europe and Central Asia | Cohort          | Living kidney donors between 1985-2002 in Norway. Only first transplants included.                                                                                                                            | 1319                   | 763                           | 49.3 (SD=12.3)               |
| Reeves-Daniel 2009 <sup>27</sup> | To explore the reasons for nondonation among living kidney donors and to assess for racial and/or gender differences.                                                                                                          | North America           | Cross-sectional | Potential donors from single-center who completed any portion of live donation evaluation process but could not donate.                                                                                       | 541                    | 42                            | 41.1 (SD=12)                 |
| Rios 2007 <sup>28</sup>          | To analyze the attitudes toward living kidney donation among population groups originating from Ireland and who live in Southeast Spain.                                                                                       | Europe and Central Asia | Cross-sectional | Random sample of general adult population who reside in Southeast Spain and who were born in Ireland. Study population were those who were born in Ireland and control group being local residing population. | 262                    | NR                            | NR                           |
| Rios 2012 <sup>29</sup>          | To analyse the attitudes of adolescents toward living organ donation, and to determine the psychosocial variables affecting these attitudes.                                                                                   | Europe and Central Asia | Cross-sectional | Adolescent school students in Southeast Spain.                                                                                                                                                                | 3545                   | NR                            | NR                           |
| Rios 2018 <sup>30</sup>          | To analyse the attitude towards living kidney donation among the Ecuadorian population residing in Spain.                                                                                                                      | Europe and Central Asia | Cross-sectional | Adult Ecuadorian residents in Spain.                                                                                                                                                                          | 461                    | NR                            | NR                           |

| Study ID                    | Aim of the study                                                                                                                                                                                                                          | Region                       | Study design    | Population description and inclusion criteria                                                                                                                                                               | Number of participants | Gender distribution (% males) | Mean age (years) (SD, Range) |
|-----------------------------|-------------------------------------------------------------------------------------------------------------------------------------------------------------------------------------------------------------------------------------------|------------------------------|-----------------|-------------------------------------------------------------------------------------------------------------------------------------------------------------------------------------------------------------|------------------------|-------------------------------|------------------------------|
| Rodrigue 2006 <sup>31</sup> | To examine whether donor expectancies varied as function of relational status or gender.                                                                                                                                                  | North America                | Cross-sectional | All adults undergoing evaluation for living kidney donation at University of Florida were able to complete live donor expectancies questionnaire.                                                           | 362                    | 41                            | 40.4 (SD=11.3)               |
| Sanner 1998 <sup>32</sup>   | To describe the willingness to receive material of different origins in one's own body. To compare the willingness to donate while alive and after death. To compare the willingness to donate to next-of-kin and unknown recipients.     | Europe and Central Asia      | Cross-sectional | Adult General population in Uppsala in Sweden.                                                                                                                                                              | 1060                   | 47                            | NR                           |
| Stothers 2005 <sup>33</sup> | To describe and quantify factors that influence decisions about living kidney donation for both potential recipient and donor.                                                                                                            | North America                | Cross-sectional | Live kidney donors at St. Paul's hospital in Vancouver between 1997 and 2001 and nondonating relatives and friends referred in response to specific mailed request by patients on deceased kidney waitlist. | 341                    | NS                            | NR                           |
| Taheri 2010 <sup>34</sup>   | To examine the gender disparities in the Iranian program of living kidney donation.                                                                                                                                                       | Middle East and North Africa | Cross-sectional | Donors and recipients in Iranian national data registry of Kidney transplantations between 1984 and 2006.                                                                                                   | 16 672                 | 80                            | 28 (SD=7)                    |
| Tarabeih 2021 <sup>35</sup> | To explore the decision making regarding which parent would donate to their child among Muslim Arab parents of pediatric patients with kidney failure.                                                                                    | Middle East and North Africa | Qualitative     | Parents of children with a kidney transplant if both were of Muslim faith, Arab nationality, at least 1 year of dialysis treatment before transplant surgery, and age of child less than 18.                | 31                     | 19                            | NR                           |
| Terrell 2004 <sup>36</sup>  | To explore the relationship between motivation to volunteer, gender, cultural mistrust and willingness to donate organs among black students.                                                                                             | North America                | Cross-sectional | Black students enrolled in psychology courses at a predominantly public University located in South-west.                                                                                                   | 107                    | 33                            | NR                           |
| Thiel 2005 <sup>37</sup>    | To explore the gender disparities in living kidney donation in Switzerland.                                                                                                                                                               | Europe and Central Asia      | Cross-sectional | Living kidney donors in Switzerland from 1993-2003.                                                                                                                                                         | 631                    | 35                            | NR                           |
| Thiessen 2021 <sup>38</sup> | To determine how living kidney donors view risk, quantify their risk tolerance to post donation kidney failure and ascertain if the perceptions of closeness with their intended recipient would affect their willingness to accept risk. | North America                | Mixed-methods   | Potential living kidney donors presenting for evaluation in three US kidney transplant centers between Nov 2014 and Feb 2016.                                                                               | 305                    | 39                            | 43.7 (SD=12.4)               |

| Study ID                               | Aim of the study                                                                                                                                                                                                                                                                                  | Region                  | Study design    | Population description and inclusion criteria                                                                                                                                                                                | Number of participants | Gender distribution (% males) | Mean age (years) (SD, Range) |
|----------------------------------------|---------------------------------------------------------------------------------------------------------------------------------------------------------------------------------------------------------------------------------------------------------------------------------------------------|-------------------------|-----------------|------------------------------------------------------------------------------------------------------------------------------------------------------------------------------------------------------------------------------|------------------------|-------------------------------|------------------------------|
| Thompson 2003 <sup>39</sup>            | To explore the gender differences in willingness to donate organs and conversations with family members about organ donation.                                                                                                                                                                     | North America           | Cross-sectional | Adult (>21 years of age) general population.                                                                                                                                                                                 | 856                    | 42                            | NR                           |
| Tuohy 2006 <sup>40</sup>               | To examine the pool of potential kidney donors to determine at which point in the live donor evaluation process the gender disparity develops.                                                                                                                                                    | North America           | Cohort          | Potential kidney donors who had initial phone consultation with nurse coordinator and proceeded with tissue typing and crossmatch.                                                                                           | 506                    | 45                            | NR                           |
| Villafuerte-Ledesma 2019 <sup>41</sup> | To clarify the reasons for exclusion of LKDT and consequences for discarded transplant candidates in the following 5 years.                                                                                                                                                                       | Europe and Central Asia | Cohort          | Donor-recipient couples evaluated in the Spanish Transplant center between Jan 2005 to Dec 2013.                                                                                                                             | 781                    | NR                            | NR                           |
| vonZur-Muhlen 2017 <sup>42</sup>       | To analyse gender differences in attitudes, motives, experiences, and follow up after living kidney donation and study whether there were changes in aspects studied over time.                                                                                                                   | Europe and Central Asia | Cross-sectional | Living kidney donors who donated from 1974 to Sep 2008 at University hospital in Uppsala, Sweden.                                                                                                                            | 387                    | 41                            | 49 (SD= 10)                  |
| Yang 2012 <sup>43</sup>                | To investigate the attitudes and psychosocial factors that could influence living kidney donation among relatives of kidney failure patients in a transplant centre in central China.                                                                                                             | East Asia and Pacific   | Cross-sectional | Family members of patients with kidney failure in the transplant center in central China.                                                                                                                                    | 358                    | NR                            | NR                           |
| Yee 2021 <sup>44</sup>                 | To identify reasons for sex disparities in organ donation and strategies for equity.                                                                                                                                                                                                              | North America           | Cross-sectional | Adult (>18yrs) residents of the USA.                                                                                                                                                                                         | 667                    | 45                            | NR                           |
| Zimmerman 2000 <sup>45</sup>           | To identify the reasons behind gender disparity among living kidney donors. To determine if modifiable factors account for apparent underrepresentation of men among living donor population by examining donor families more closely and interviewing living donor kidney transplant recipients. | North America           | Cohort          | All living donor transplant population (Recipients and all potential and acceptable donors) in Toronto hospital in Canada between 1991-1996. Only adult first-degree relatives and spouse were included as potential donors. | 1024                   | 47                            | NR                           |

NR: Not reported. R: range.

## References

1. Achille M, Soos J, Fortin MC, et al. Differences in psychosocial profiles between men and women living kidney donors. *Clin Transpl.* 2007;21(3):314–320.
2. Adekoya AO, Desalu OO, Onakoya JA, et al. Willingness of Nigerians to donate a kidney. *Niger.* 2012;22(4):282–287.
3. Almeida N, Almeida A. Community attitudes toward kidney donation in India. *Transplant Proc.* 2013;45(4):1307–1309.
4. Bailey PK, Tomson CRV, MacNeill S, et al. A multicenter cohort study of potential living kidney donors provides predictors of living kidney donation and non-donation. *Kidney Int.* 2017;92(5):1249–1260.
5. Bloembergen WE, Port FK, Mauger EA, et al. Gender discrepancies in living related renal transplant donors and recipients. *J Am Soc Nephrol.* 1996;7(8):1139–1144.
6. Bromberger B, Spragan D, Hashmi S, et al. Pregnancy-induced sensitization promotes sex disparity in living donor kidney transplantation. *J Am Soc Nephrol.* 2017;28(10):3025–3033.
7. Decker O, Winter M, Braehler E, et al. Between commodification and altruism: gender imbalance and attitudes towards organ donation. A representative survey of the German community. *J Gend Stud.* 2008;17(3):251–255.
8. Feizi M, Moeindarbari T. Donor willingness to accept selling a kidney for transplantation: evidence from Iran. *J Urol.* 2019;201(2):235–236.
9. Ge F, Kaczmarczyk G, Biller-Andorno N. Attitudes toward live and postmortem kidney donation: a survey of Chinese medical students. *Exp Clin Transplant.* 2014;12(6):506–509.
10. Ghods AJ, Nasrollahzadeh D. Gender disparity in a live donor renal transplantation program: assessing from cultural perspectives. *Transplant Proc.* 2003;35(7):2559–2560.
11. Gibney EM, Doshi MD, Hartmann EL, et al. Health insurance status of US living kidney donors. *Clin J Am Soc Nephrol.* 2010;5(5):912–916.
12. Gill J, Joffres Y, Rose C, et al. The change in living kidney donation in women and men in the United States (2005–2015): a population-based analysis. *J Am Soc Nephrol.* 2018;29(4):1301–1308.
13. Güden E, Çetinkaya F, Naçar M. Attitudes and behaviors regarding organ donation: a study on officials of religion in Turkey. *J Relig Health.* 2013;52(2):439–449.
14. Inthorn J, Wohlke S, Schmidt F, et al. Impact of gender and professional education on attitudes towards financial incentives for organ donation: results of a survey among 755 students of medicine and economics in Germany. *BMC Med Ethics.* 2014;15:56.
15. Kayler LK, Meier-Kriesche HU, Punch JD, et al. Gender imbalance in living donor renal transplantation. *Transplantation.* 2002;73(2):248–252.

16. Kayler LK, Rasmussen CS, Dykstra DM, et al. Gender imbalance and outcomes in living donor renal transplantation in the United States. *Am J Transplant.* 2003;3(4):452–458.
17. Kayler LK, Armenti VT, Dafoe DC, et al. Patterns of volunteerism, testing, and exclusion among potential living kidney donors. *Health Care Women Int.* 2005;26(4):285–294.
18. Khajehdehi P. Living non-related versus related renal transplantation-Its relationship to the social status, age and gender of recipients and donors. *Nephrol Dial Transplant.* 1999;14(11):2621–2624.
19. Kurnikowski A, Krenn S, Lewandowski MJ, et al. Country-specific sex disparities in living kidney donation. *Nephrol Dial Transplant.* 2022;37(3):595–598.
20. Loiselle MM, Gulin S, Rose T, et al. The relationship between marijuana use and psychosocial variables in living kidney donor candidates. *Clin Transplant.* 2021;35(5):e14248.
21. Malakoutian T, Hakemi MS, Nassiri AA, et al. Socioeconomic status of Iranian living unrelated kidney donors: a multicenter study. *Transplant Proc.* 2007;39(4):824–825.
22. Martinez-Alarcon L, Ramis G, Gomez-Laguna J, et al. Attitude toward living kidney donation: differences between students from two spanish universities. *Transplant Proc.* 2015;47(1):10–12.
23. Milaniak I, Ruzyczka EW, Przybylowski P. Factors influencing decision making about living donation among medical students. *Transplant Proc.* 2020;52(7):1994–2000.
24. Mithra P, Ravindra P, Unnikrishnan B, et al. Perceptions and attitudes towards organ donation among people seeking healthcare in tertiary care centers of coastal South India. *Indian J Palliat Care.* 2013;19(2):83–87.
25. Naqvi SAA, Mazhar F, Ahmed R, et al. Limitation in selection of donors in a living-related renal transplant programme. *Transplant Proc.* 1998;30(5):2286–2288.
26. Oien CM, Reisaeter AV, Leivestad T, et al. Gender imbalance among donors in living kidney transplantation: the Norwegian experience. Comparative study research support, non-U.S. Gov't. *Nephrol Dial Transplant.* Apr 2005;20(4):783–789.
27. Reeves-Daniel A, Adams PL, Daniel K, et al. Impact of race and gender on live kidney donation. *Clin Transplant.* 2009;23(1):39–46.
28. Rios A, Martinez-Alarcon L, Ramirez P, et al. Irish residents in southeastern Spain: in search of favorable groups to encourage living kidney donation in Spain. *Transplant Proc.* 2007;39(7):2068–2071.
29. Rios A, Febrero B, Lopez-Navas A, et al. Evaluation of attitude toward living organ donation among adolescents in Southeast Spain. *Transplant Proc.* 2012;44(6):1489–1492.
30. Rios A, Lopez-Navas AI, Sanchez A, et al. Multivariate analysis of factors that influence the attitude of the Ecuadorian population resident in Spain toward living-related kidney donation. *Transplant Proc.* 2018;50(2):366–369.

31. Rodrigue JR, Widows MR, Guenther R, et al. The expectancies of living kidney donors: do they differ as a function of relational status and gender? *Nephrol Dial Transplant*. 2006;21(6):1682–1688.
32. Sanner MA. Giving and taking - to whom and from whom? People's attitudes toward transplantation of organs and tissue from different sources. *Clin Transplant*. 1998;12(6):530–537.
33. Stothers L, Gourlay WA, Liu L. Attitudes and predictive factors for live kidney donation: a comparison of live kidney donors versus nondonors. *Kidney Int*. 2005;67(3):1105–1111.
34. Taheri S, Alavian SM, Einollahi B, et al. Gender bias in Iranian living kidney transplantation program: a national report. *Clin Transplant*. 2010;24(4):528–534.
35. Tarabehi M, Bokek-Cohen Ya. The gendered body work of Muslim Arab mothers who donate a kidney to their children. *J Pediatr Nurs*. 2021;60:e68–e73.
36. Terrell F, Mosley KL, Terrell AS, et al. The relationship between motivation to volunteer, gender, cultural mistrust, and willingness to donate organs among Blacks. *J Natl Med Assoc*. 2004;96(1):53–60.
37. Thiel GT, Nolte C, Tsinalis D. Gender imbalance in living kidney donation in Switzerland. *Transplant Proc*. 2005;37(2):592–594.
38. Thiessen C, Gannon J, Li S, et al. Quantifying risk tolerance among potential living kidney donors with the donor-specific risk questionnaire. *Am J Kidney Dis*. 2021;78(2):246–258.
39. Thompson TL, Robinson JD, Kenny R. Gender differences in family communication about organ donation. *Sex Roles: J Res*. 2003;49(11-12):587–596.
40. Tuohy KA, Johnson S, Khwaja K, et al. Gender disparities in live kidney donor evaluation process. *Transplantation*. 2006;82(11):1402–1407.
41. Villafuerte-Ledesma HM, De Sousa-Amorim E, Peri L, et al. Impact of discards for living donor kidney transplantation in a transplant program. *Transplant Proc*. 2019;51(10):3222–3226.
42. von Zur-Muhlen B, Yamamoto S, Wadstrom J. Few gender differences in attitudes and experiences after live kidney donation, with minor changes over time. *Ann Transplant*. 2017;22:773–779.
43. Yang H, Wang Z, Li H, et al. Factors influencing attitudes of relatives of renal failure patients toward living kidney donation: central China. *Transplant Proc*. 2012;44(10):2921–2924.
44. Yee E, Hosseini SM, Duarte B, et al. Sex disparities in organ donation: finding an equitable donor pool. *J Am Heart Assoc*. 2021;10(19):e020820.
45. Zimmerman D, Donnelly S, Miller J, et al. Gender disparity in living renal transplant donation. *Am J Kidney Dis*. 2000;36(3):534–540.
